# Supplementary material
Source: PubMed Central journal article supplement (PMC8383154)
Supplement: NIHMS1730382-supplement-1.pdf [file NIHMS1730382-supplement-1.pdf]

**Cell Reports, Volume 36**

**Supplemental information**

**Exocyst protein subnetworks integrate**

**Hippo and mTOR signaling**

**to promote virus detection and cancer**

**Aubhishek Zaman, Xiaofeng Wu, Andrew Lemoff, Sivaramakrishna Yadavalli, Jeon Lee, Chensu Wang, Jonathan Cooper, Elizabeth A. McMillan, Charles Yeaman, Hamid Mirzaei, Michael A. White, and Trevor G. Bivona**

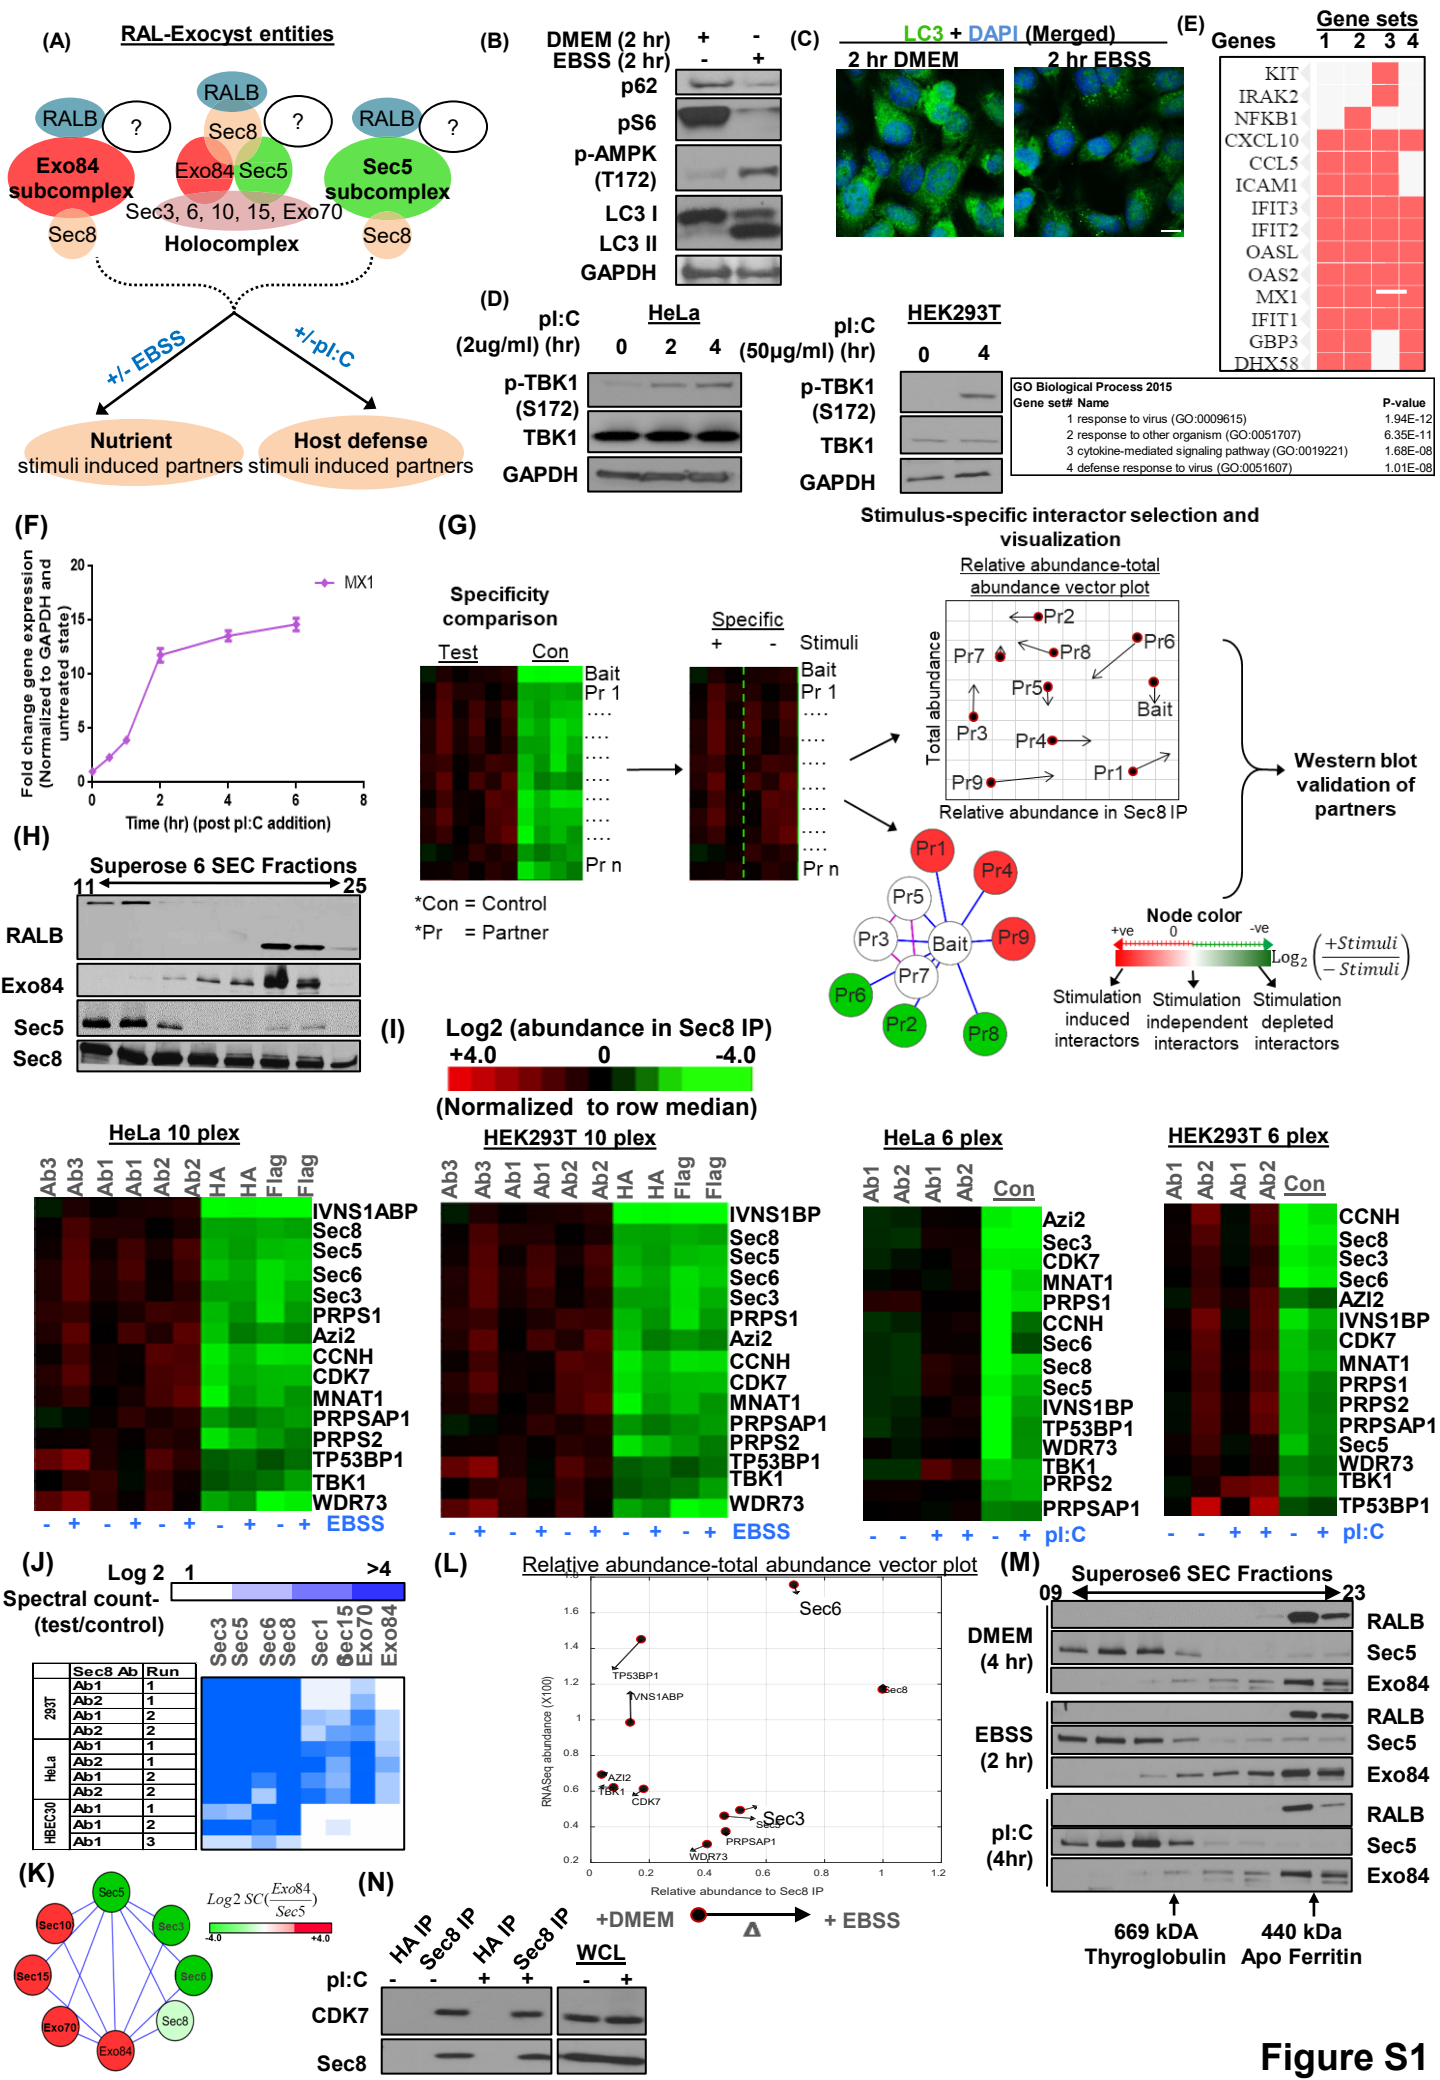

Figure S1

**Figure S1. Distinct exocyst subcomplexes and dynamic alteration of their neighborhood, related to Figure 1.**

**(A) Schematic illustration of the Ral-exocyst complexes and the strategy for AP-MS as a discovery platform to identify novel context specific exocyst interacting proteins.**

**(B and C) Cellular response to nutrient challenge.** HEK293T cells were incubated with growth media without serum or Earle's basic saline solution (EBSS) as indicated. Whole cell lysates were analyzed for the indicated proteins using SDS-PAGE **(B)**; endogenous LC3 was visualized in fixed cells using an established anti-LC3 antibody (number of cells >50) **(C)**.

**(D, E and F) Cellular response to dsRNA analog polyI:C or Sendai virus.** **(D)** HeLa and HEK293T cells incubated with pl:C for the indicated time periods were collected and analyzed for the indicated proteins using SDS-PAGE. **(E)** Whole transcriptomes from HeLa cells treated with pl:C and SeV were evaluated individually (data summarized as follows - only pl:C gene sets: KEGG NF-kappa B signaling pathway:  $p < 0.01$ ; IRF3 pathway:  $p < 0.01$ ; only SeV gene set: KEGG NF-kappa B signaling pathway:  $p < 0.01$ ) and combined **(E)** for stimulus-specific enrichments of gene ontologies. Significant genes sets are shown together with leading-edge genes. p-values indicate significance of overlap for hypergeometric density distribution. **(F)** MX1, an established IFN- $\beta$  response gene, was measured by rtPCR for transcript abundance over time after pl:C challenge. Error bars are Mean  $\pm$  SD.

**(G) AP-MS analysis pipeline.** Test and control antibody immunoprecipitates from baseline, nutrient challenged and pl:C challenged samples were characterized by LC-MS. Specificity was defined by enrichment in test samples over controls. Stimulus specific fold change for each interacting protein was measured and visualized either as a relative abundance versus total abundance vector plot or as a network (see methods for details). Candidate partner bait interaction was validated using IP western blot.

**(H) Exocyst subunit partition profile.** Size exclusion column chromatography fractions of high molecular weight complexes in HEK293T cells were analyzed for the partition profile of the indicated proteins using SDS-PAGE. Data are representative of 3 independent replicates.

**(I) Intensity profile of the Sec8 core complex members.** Heatmaps represent intensity profile (row median normalized) of the core complex components in HEK293T and HeLa cells.

**(J) Sec8 affinity purification recovers all known subunits of the exocyst holocomplex.** Sec8 was immunoprecipitated using two epitope specific antibodies in three human epithelial cell lines

and analyzed for spectral count abundance of known exocyst subunits using MS/MS. The heatmap indicates log<sub>2</sub> fold enrichment of exocyst subunits in test versus control antibody conditions. Row labels describe cell lines, antibody ID and replicate information for the immunoprecipitates.

**(K) Selective enrichment of exocyst subunits between Exo84 and Sec5.** Epitope tagged Exo84 and Sec5 were immunoprecipitated (n=8) from HEK293T cells and analyzed for coimmunoprecipitation of exocyst subunits using LC-MS. The results were merged and displayed as a network. The color bar indicates Node color indicates enrichment score, with green centered on Sec5 and red centered on Exo84.

**(L) Stimulus-dependent effects on the Sec8 interactome.** Nutrient challenge-specific relative abundance versus total abundance vector plot of core Sec8 complex members is shown. Filled circles indicate pre-stimulus values and arrowheads indicate post-stimulus values.

**(M) Exocyst subcomplex partition profile under nutrient and immune stimuli.** High molecular weight complexes from HEK293T cells, treated as indicated, were isolated using Superose6 size exclusion column chromatography and the partition profiles for the indicated proteins were analyzed using SDS-PAGE.

**(N) CDK7-Sec8 interaction is independent of pl:C challenge.** HEK293T cells were incubated with growth media or pl:C and endogenous Sec8 was immunoprecipitated and analyzed for coimmunoprecipitation of CDK7. Data are representative of 3 independent replicates.



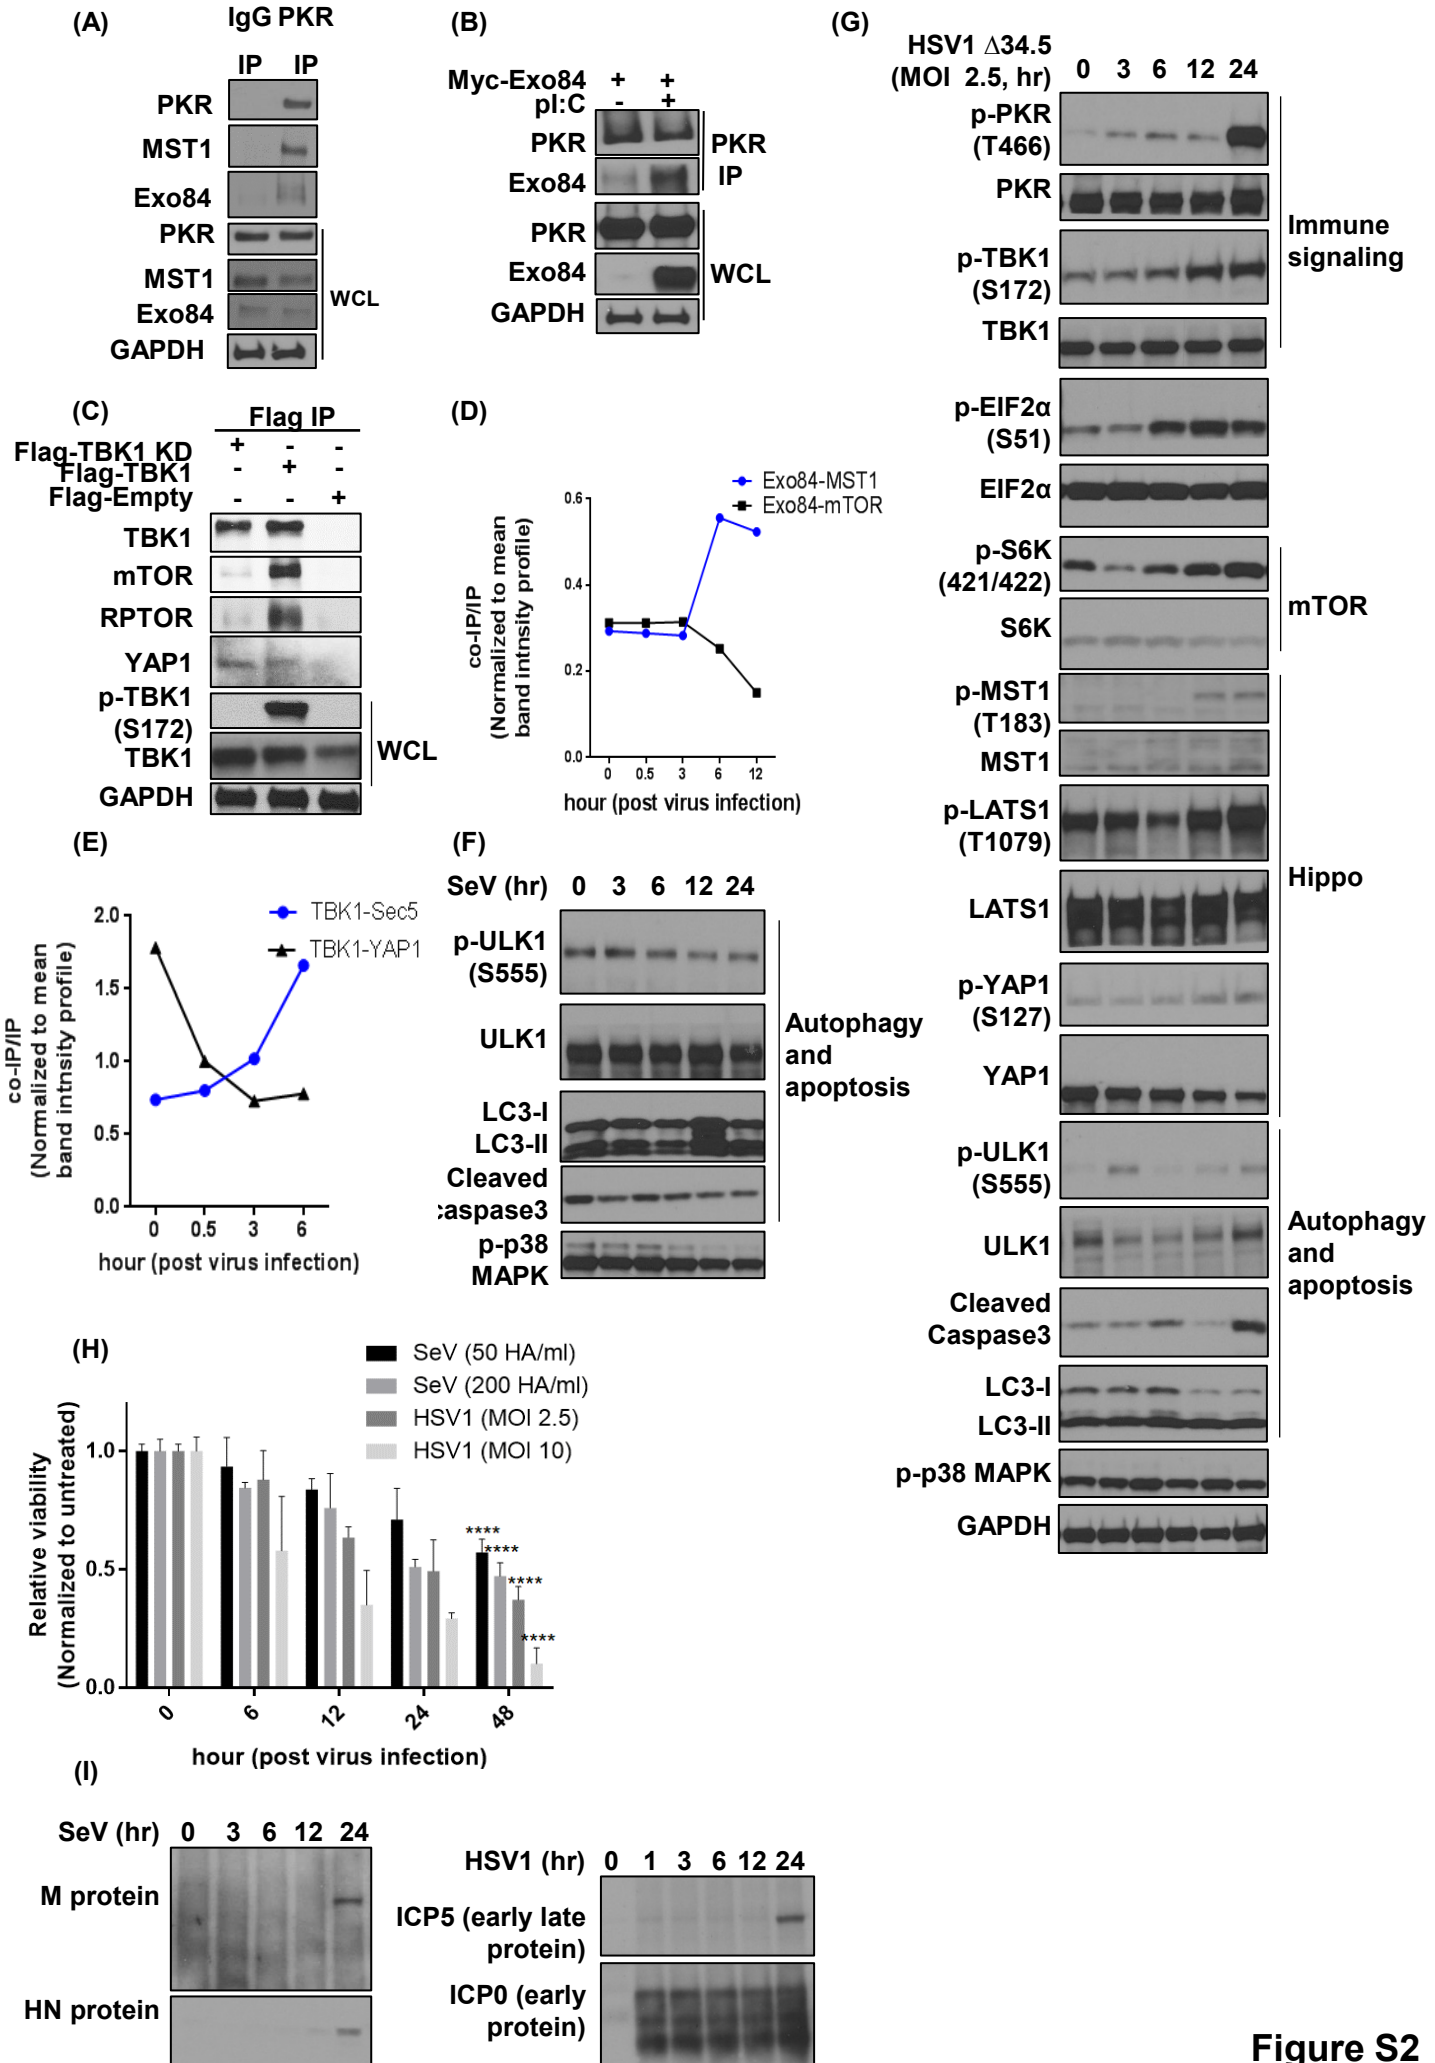

Figure S2

**Figure S2. Characterization of ternary complexes assembled on exocyst subcomplexes and candidate downstream signaling, related to Figure 2.**

**(A) PKR interacts with MST1 and Exo84.** Endogenous PKR immunoprecipitated samples were analyzed by SDS-PAGE for coimmunoprecipitation of indicated proteins. Data are representative of 3 independent replicates.

**(B) PKR immunoprecipitation of Exo84 is stimulus sensitive.** HEK293T cells ectopically expressing Myc-tagged Exo84 were treated with pl:C for indicated hours and endogenous PKR was immunoprecipitated from confluent cells. The indicated proteins were analyzed for coimmunoprecipitation using SDS-PAGE. Data are representative of 2 independent replicates.

**(C) TBK1 interacts with mTOR and YAP1.** Flag tagged active TBK1, kinase dead (KD) TBK1 or empty vector were expressed in HEK293T cells and immunoprecipitation was performed using an anti-Flag antibody. Immunoprecipitates were analyzed for coimmunoprecipitation of the indicated proteins. Data are representative of 2 independent replicates.

**(D) Kinetics of Exo84-MST1/mTOR interaction.** Interaction kinetics was analyzed by quantifying band intensities in **Figure 2C** and **D**, followed by normalized to mean band intensity profile. Data is represented as a line plot.

**(E) Kinetics of TBK1-Sec5/YAP1 interaction.** Interaction kinetics was analyzed by quantifying band intensities in **Figure 2E** and **F**, followed by normalized to mean band intensity profile. Data is represented as a line plot.

**(F) Sendai virus infection induces Hippo signaling, but not autophagy.** HEK293T cells infected with Sendai virus for indicated time periods. Cell lysates were analyzed for levels of the indicated proteins using SDS-PAGE. Data are representative of 2 independent replicates.

**(G) Kinetic analysis of HSV1 infection on cellular pathways.** HEK293T cells infected with HSV1  $\Delta$ 34.5 (MOI 2.5) for the indicated time periods. Cells were collected to analyze for levels of the indicated proteins using SDS-PAGE. Data are representative of 2 independent replicates.

**(H) Toxicity kinetics of SeV and HSV1.** HEK293T cells were infected with two different doses of SeV and HSV1 viruses for the indicated time periods and surviving fractions were measured using a standard Cell Titer Glo assay. Data are represented as a histogram with Mean  $\pm$  SD where  $n=3$ . \*\*\*\* denotes statistical significance between the 48 hr time point and 0 hr time point using Student's t test where  $p<0.001$ .

**(I) SeV and HSV1 viral protein expression kinetics.** HEK293T cells were infected with SeV (50 HA/ml) and HSV1 (MOI 2.5) for the indicated time periods. Cells were collected to analyze for levels of the indicated proteins using SDS-PAGE. Data are representative of 2 independent replicates.

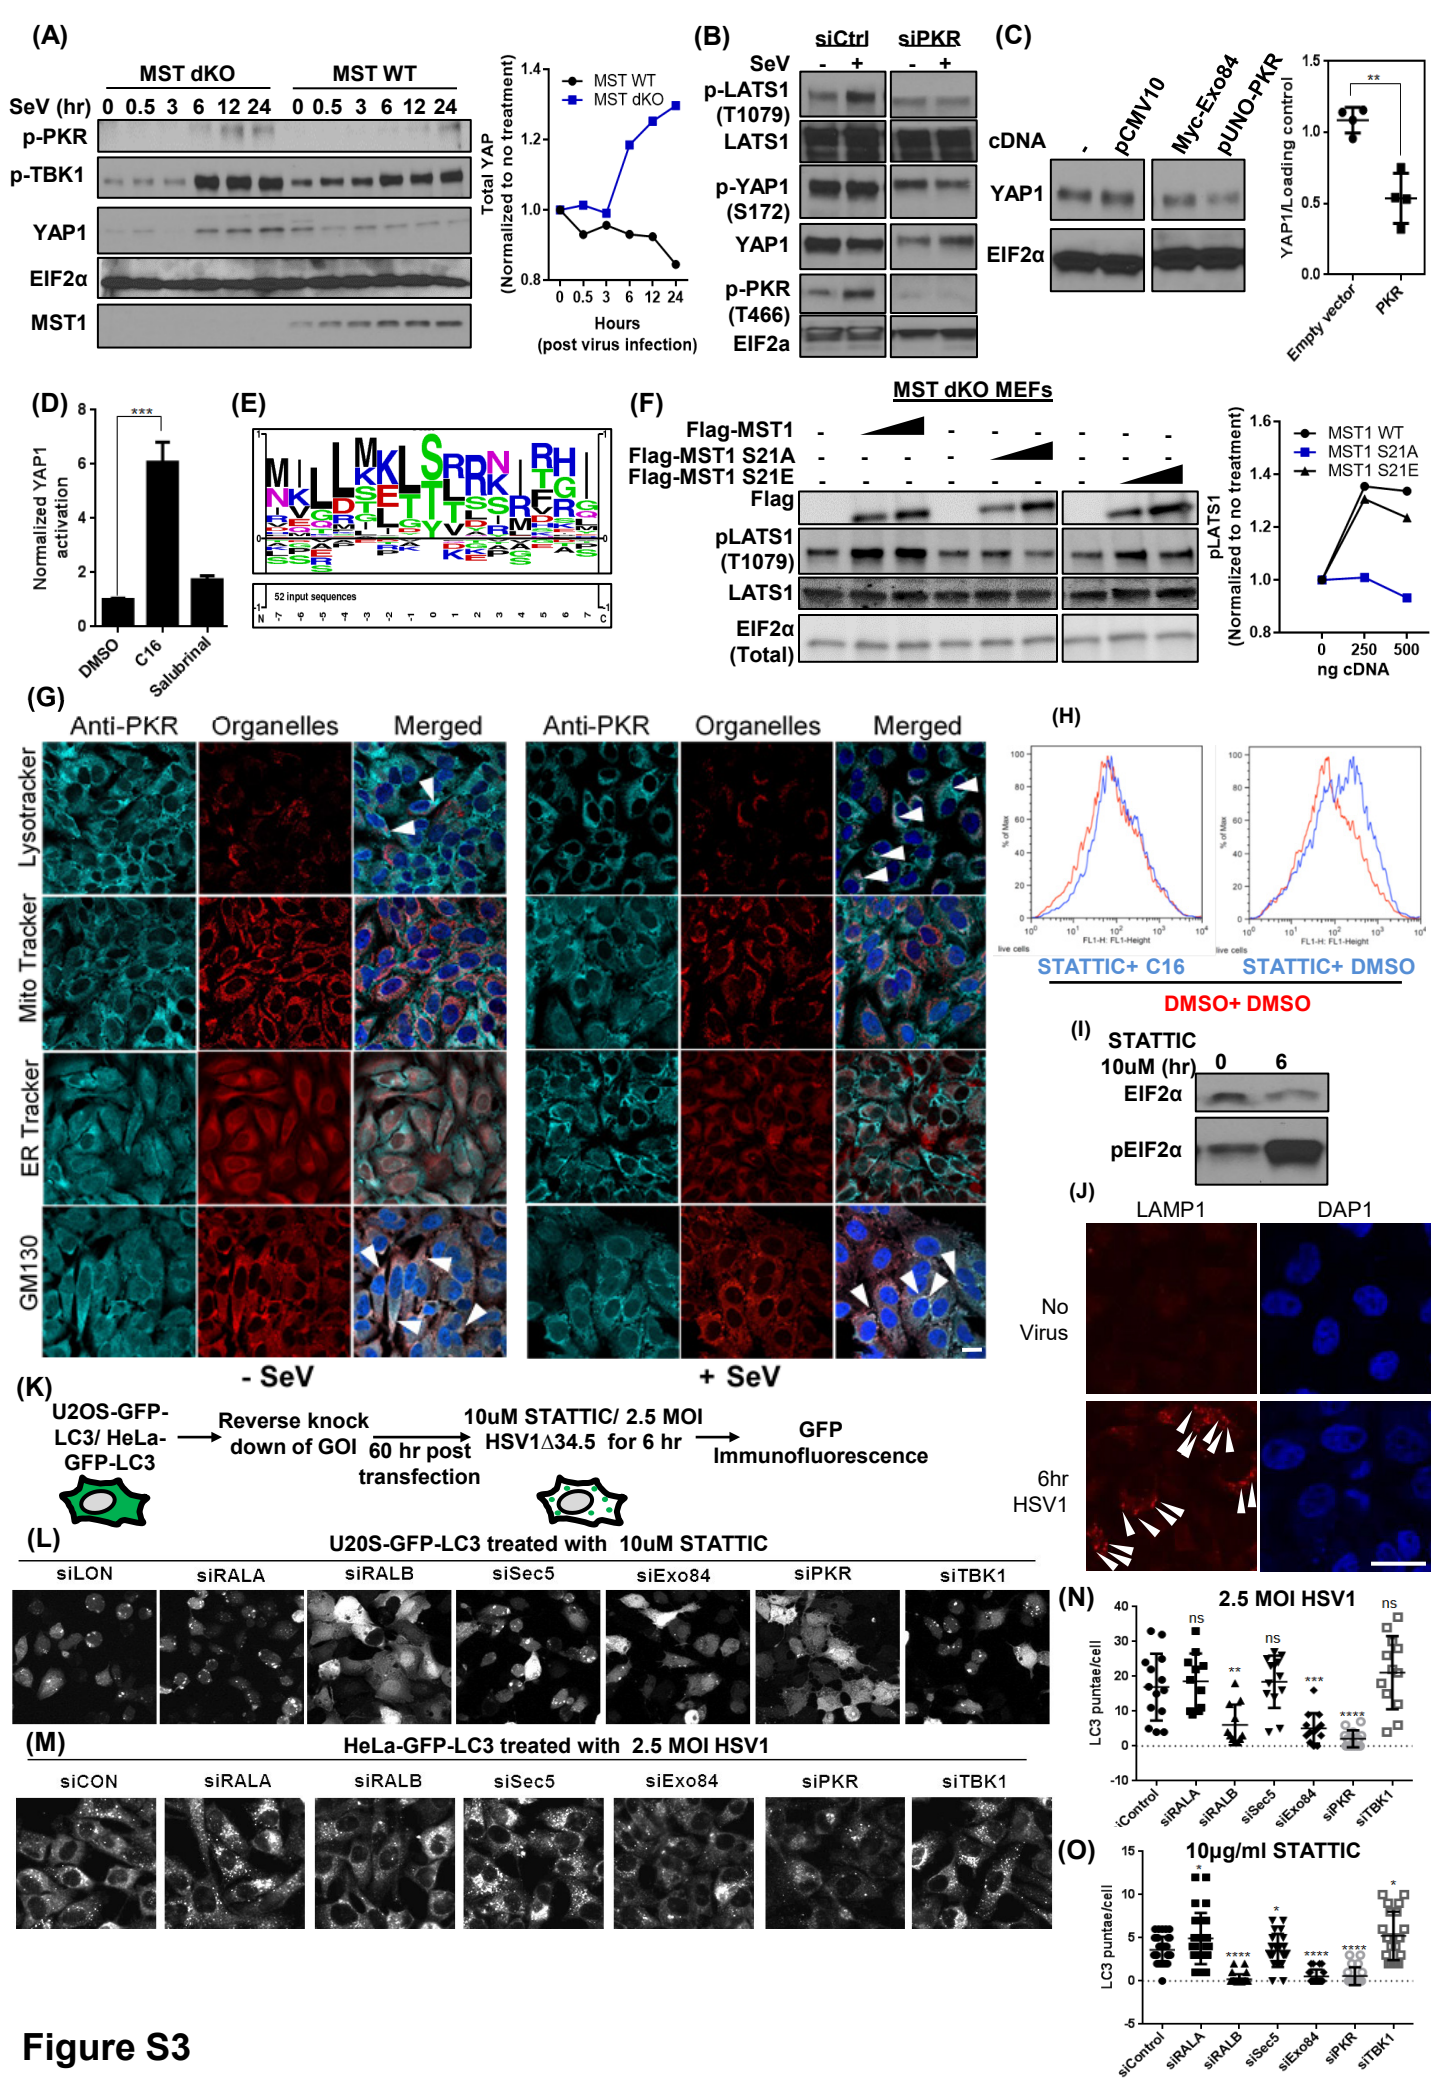

**Figure S3**

**Figure S3. Functional consequence of PKR/MST1 protein complex assembly on Exo84 subcomplex, related to Figure 3.**

**(A) MST deficiency cause defect in virus infection mediated YAP1 suppression.** MST1/2 deficient (MST dKO) and proficient MEFs were treated with SeV for indicated hours. Harvested cells were probed for level of indicated proteins using SDS-PAGE. Total YAP1 band intensity was quantified and represented as a line plot.

**(B) PKR depletion abrogates LATS1 activity.** HEK293T cells were reverse transfected with the indicated short interfering RNAs and were incubated with Sendai virus for 10 hr. Cell lysates were analyzed for indicated proteins using SDS-PAGE. Western blot images run on the same membrane were analyzed for comparison. Data are representative of 2 independent replicates.

**(C) PKR is sufficient to reduce YAP1 stability.** Non-confluent HEK293T cells transiently expressing the indicated constructs were grown to confluence and then incubated with EBSS for 1 hour followed by incubation with DMEM for 30 minutes to induce YAP1 activity. Lysates were collected from each sample and analyzed for the indicated proteins using SDS-PAGE. Data are represented as a histogram with Mean  $\pm$  SD. Statistical comparison between treatment cohorts was measured using a Student's t test where p value < 0.01. Western blot images run on the same membrane were analyzed for comparison. Data are representative of 4 independent replicates.

**(D) Hippo pathway downregulation mediated by PKR inhibition is EIF2 $\alpha$  independent.** HEK293T cells transiently dual transfected with 8XGTIIC-luc luciferase regulating firefly luciferase and CMV promoter regulated renilla luciferase reporter were treated 6 hours with IC50 dose of C16 and Salubrinal (EIF2 $\alpha$ i) or vehicle control (DMSO). The reporter activity was measured by specific/control luminescence signal ratio. Data were normalized to vehicle treatment. Statistical comparison between treatment cohorts were measured using a Student's t test where p value < 0.001, where n=3.

**(E) PKR recognition motif.** The sequence recognition motif for PKR is represented as a logo based on 52 input sequences from PhosphoSitePlus database.

**(F) MST1 S21A mutants are incapable of engaging downstream Hippo signaling kinase LATS1.** MST dKO MEFs were transfected with titrating amounts of MST1 wildtype or MST1 S21A or MST21E mutant cDNA expressing plasmids and grown to 90% confluency. Cell lysates were collected and probed for indicated proteins using SDS-PAGE. Western blot images run on the

same membrane were juxtaposed for comparison purpose. Band intensities collected from two independent replicates were quantified and represented as Mean  $\pm$  SD in a trendline plot.

**(G) Colocalization of PKR with cellular organelles.** HeLa cells grown on coverslips were fixed and stained with fluorophore conjugated organelle markers and PKR antibody. For Golgi localization GM130 antibody was used. Alexa Fluor 488 against anti-PKR raised in rabbit Alexa fluor 694 against anti-GM130 raised in mouse was used. DAPI (488nm) indicates the nucleus. Colocalization was analyzed by confocal microscopy. Images are pseudocolored and superimposed for colocalization analysis. White arrowheads highlight few areas of colocalizations in the field of view. Number of cells viewed >100. Scale bar indicates 20 $\mu$ m.

**(H and I) STATTIC induces PKR mediated autophagy.** **(H)** U2OS cells stably transfected with GFP tagged LC3 construct were grown to confluence and treated 10 hour with 2  $\mu$ M of the indicated compounds. Cells were collected and Single-cell fluorescence intensity was measure for GFP positive cells. Sample annotation font color is paired with single-cell fluorescence intensity profile. **(I)** In a parallel experiment confluent HeLa cells were incubated with 10 $\mu$ M of the STATTIC and were analyzed for the proteins indicated using SDS-PAGE.

**(J) HSV1 infection causes lysosome nucleation.** HeLa cells were infected with or without HSV1  $\Delta$ 34.5 for 6 hour. Fixed cells were analyzed for immunofluorescence for LAMP1- a lysosomal marker. White arrowheads highlight few LAMP1 puncta in the field of view. Number of cells viewed >50. Scale bar indicates 20 $\mu$ m.

**(K, L, M, N and O) Exo84 and RALB are required for PKR induced xenophagy.** **(K)** Schematic representation for immunofluorescence-based analysis for identifying genetic components necessary for virus and STATTIC mediated autophagy. **(L)** U2OS-LC3-GFP cells were transiently transfected with indicated siRNAs and grown to confluence before treatment with 10 $\mu$ M of the STATTIC. Cell were fixed and analyzed for accumulation of GFP-LC3 puncta/cells. **(M)** HeLa cells were reverse transfected with indicated short interfering RNAs and were incubated with growth media with or without HSV $\Delta$ 34.5 mutant (MOI 2.5) for 6 hours. Cell were fixed and analyzed for accumulation of LC3 puncta/cells using endogenous LC3 antibody. Scale bar indicates 20 $\mu$ m. **(N and O)** Puncta from 15 representative cells from 5 different images for each condition were used to generate statistical significance. Statistical analysis for the puncta/cells for **L** and **M** were quantified, represented as Mean  $\pm$  SEM and compared between the cohorts using unpaired student's t test (\*\*\*\*=p<0.001, \*\*\*=p<0.05, \*\*=p<0.01 and \*p<0.05).



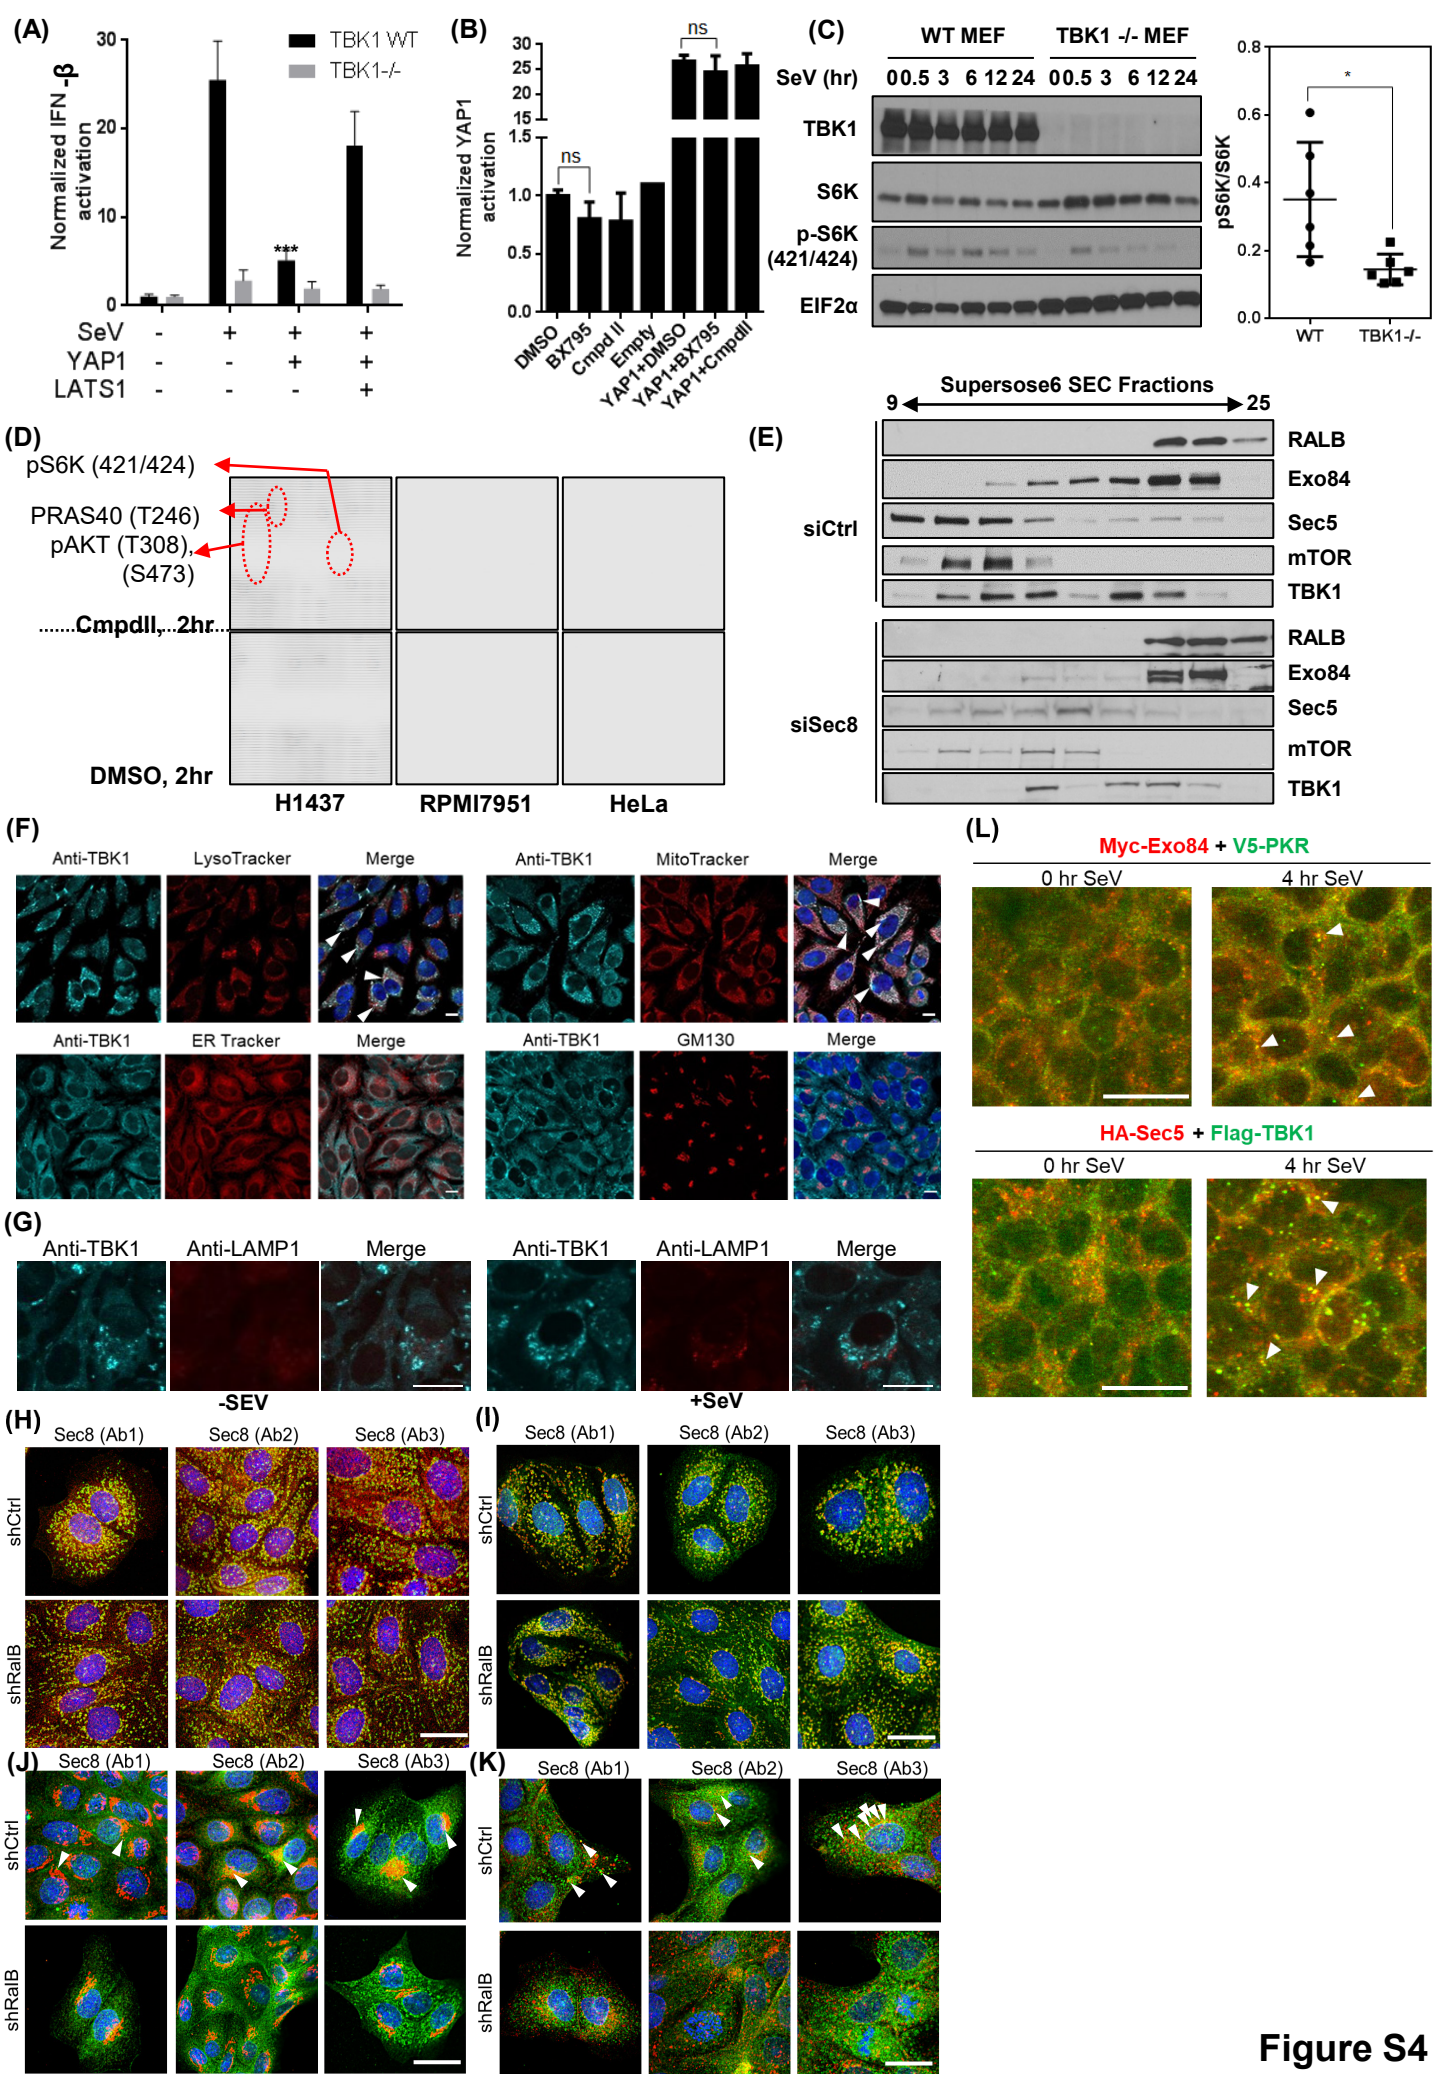

Figure S4

**Figure S4. Functional consequence of Sec5/TBK1 protein complex assembly on Sec5 subcomplex, related to Figure 4.**

**(A) YAP1 inhibits the IFN- $\beta$  response.** HEK293T cells were transiently transfected with IFN- $\beta$  promoter regulated firefly luciferase and CMV promoter regulated renilla luciferase reporters. Cells were treated with or without 6 hours of exposure to 50 HA/mL of SeV. IFN- $\beta$  activation was measured using a standard dual luciferase assay. Data are represented as a histogram with Mean  $\pm$  SD where n=3. Statistical comparison between treatment cohorts were measured using a Student's t test where p value < 0.005.

**(B) TBK1 mediated regulation of YAP1 is kinase independent.** HEK293T cells were transiently transfected with 8XGTIIC-luc firefly luciferase, renilla luciferase reporters along with indicated cDNAs and/or treated 6 hours with an ED50 dose of TBK1 inhibitors BX795 or Cmpd II or vehicle control (DMSO). YAP1 activation was measured using a standard dual luciferase assay. Data are represented as a histogram with Mean  $\pm$  SD where n=3. Statistical comparison between treatment cohorts was measured using a Student's t test.

**(C) TBK1 null (-/-) MEFs fail to sustain mTOR activation under immune challenge.** Near confluent cultures of TBK1 wildtype and TBK1 null MEFs were incubated with 200  $\mu$ g/ml Sendai virus for the indicated hours. Lysates were collected and analyzed for the indicated proteins using SDS-PAGE. From two independent replicates, the "12 hour" as well as "24 hour" treatment band intensities were grouped and compared with that of "0 hr treatment" treatment cohort. Statistical comparison between treatment cohorts (Mean  $\pm$  SEM) was measured using a Student's t test where p value < 0.05.

**(D) Cmpd II (TBK1 inhibitor) ablates PRAS40, AKT and S6K phosphorylation.** Representation of DMSO and CmpdII treated phosphor-ELISA array images two replicates in 2 CmpdII resistant cell lines (H1437 and RPMI7951) in **Figure 4H** and one sensitive cell line (HeLa). The most differentially regulated phosphorylation events are marked as red ellipses.

**(E) Sec8 knockdown disrupts the Sec5/mTOR/TBK1 complex.** HEK293T cells reverse transfected with indicated siRNAs were grown to confluence and high molecular weight complexes were isolated and were analyzed for partition profile of the indicated proteins using supersoe6 size exclusion chromatography. Data are representative of two replicates.

**(F) Colocalization of TBK1 with cellular organelles.** HeLa cells grown on coverslips were fixed and stained with organelle markers and TBK1 antibody. For Golgi localization GM130 antibody



was used. Alexa Fluor 488 against anti-PKR raised in rabbit Alexa fluor 694 against anti-GM130 raised in mouse was used. DAPI (488nm) indicates the nucleus. Colocalization was analyzed by confocal microscopy. Images are pseudocolored and superimposed for colocalization analysis. White arrowheads highlight few areas of colocalizations in the field of view. Number of cells viewed >100. Scale bar indicates 20 $\mu$ m.

**(G) TBK1 colocalizes proximal to lyso-endosomal marker LAMP1.** HeLa cells grown on coverslips were fixed and stained with anti-LAMP1 and anti-TBK1 antibody. Alexa Fluor 488 against anti-TBK1 raised in rabbit Alexa fluor 694 against anti-LAMP1 raised in mouse was used. Colocalization was analyzed by confocal microscopy. White arrowheads highlight few areas of colocalizations in the field of view. Number of cells viewed >25. Scale bar indicates 20 $\mu$ m.

**(H, I, J and K) Colocalization of Sec8 with cellular organelles.** Cells were stained with three monoclonal antibodies against Sec8 (green) and organelle markers **(H)** ER marker ERP29 (red), **(I)**, mitochondria marker AIF (red), **(J)** Golgi marker GM130 (Red) and **(K)** Lysosome marker LAMP1 (Red) in control or RALB abrogated MDCK cells. DAPI (488nm) indicates the nucleus. White arrowheads highlight few areas of colocalizations in the field of view. Number of cells viewed >25. Scale bar indicates 20 $\mu$ m.

**(L) Exo84 and Sec5 colocalizes with PKR and TBK1, respectively.** Myc-Exo84 and V5-PKR or HA-Sec5 and Flag-TBK1 was coexpressed in HEK293T cells and were stained for tag specific antibodies for colocalization in the presence or absence of SeV stimuli using confocal microscopy. White arrowheads highlight few areas of colocalizations in the field of view. Number of cells viewed >50. Scale bar indicates 20 $\mu$ m.

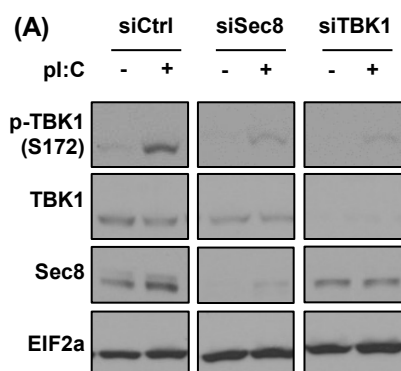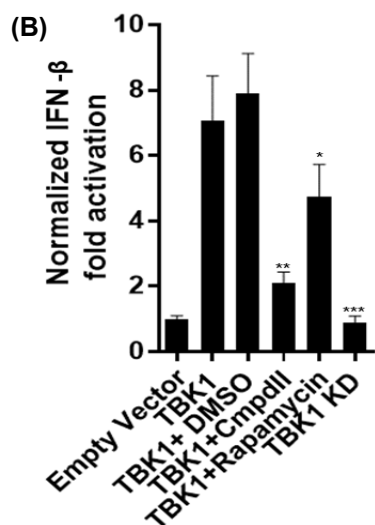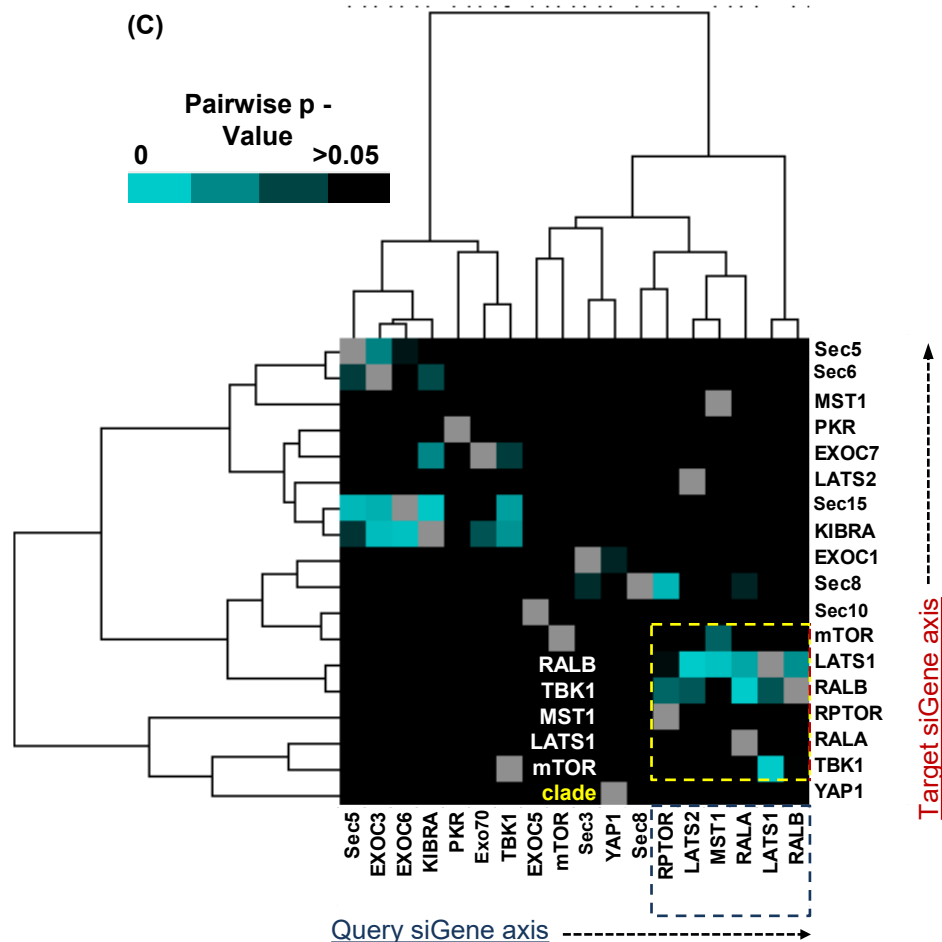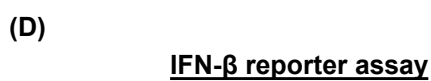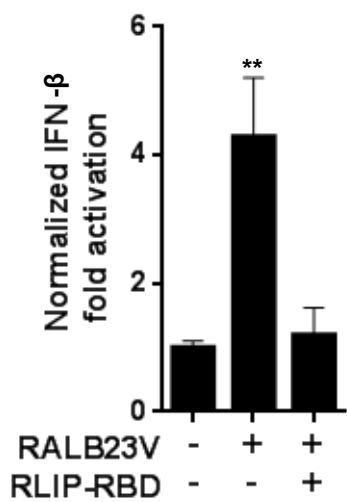

**Figure S5. RAL-Exocyst signaling axis and their role for hippo and mTOR signaling activation, related to Figure 5.**

**(A) Sec8 supports immune challenge dependent TBK1 activation.** HEK293T cells were reverse transfected with the indicated short interfering RNAs and were incubated with pl:C (2µg/mL) for indicated time periods. Cell lysates were analyzed for indicated proteins using SDS-PAGE. Data are representative of 2 independent replicates.

**(B) mTOR activation is necessary for maximal IFN-β promoter activation.** HEK293T cells ectopically expressing IFN-β reporter expressing firefly luciferase with a renilla luciferase control and plasmids expressing the indicated cDNA or empty vector were grown for 24 hours and normalized IFN-β promoter induction was measured using a standard dual luciferase assay. KD stands for kinase dead. Data are represented as a histogram representing mean ± SD, where n=3. Statistical significance between 'TBK1+DMSO' cohort and the other cohorts were measured by using unpaired Student's t-test (\*\*\*= p<0.001; \*\*=p<0.01, \*=p<0.05)

**(C) Functional relationship between RAL-exocyst and Hippo signaling using FUSION datasets.** Functional association between exocyst subunits, core Hippo pathway proteins and mTOR related hits were calculated using the FUSION1.5 dataset by measuring the similarity between gene knockdown effects expressed as a 6 gene reporter feature (Potts, Kim *et. al.* 2013). For a query gene knock down pair-wise p value for each of the rest of the 'target genes' in the list were exported from the database and an asymmetric square matrix (where effect of query knockdown to target gene ≠ effect of target gene knockdown to query gene) was generated. p-value was capped as insignificant for any value above at 0.05. The generated matrix was 2 way-clustered to identify genes behaving most similarly within the curated list of proteins.

**(D) RALB is sufficient to induce IFN-β promoter activation.** U2OS cells overexpressing IFN-β promoter regulating firefly luciferase, CMV promoter regulated renilla luciferase along with the indicated cDNAs were subjected to a standard reporter dual luciferase assay. Normalized IFN-β activation fold changes are represented as histograms representing Mean ± SD. Significance for the three independent replicates of the comparison cohorts was measured using an unpaired Students t-test. \* (asterisks) indicates p<0,05 and \*\* indicates p<0.01, where n=3.

**(E) RALB is required to induce IFN-β promoter activity.** HEK293T cells overexpressing IFN-β overexpressing 8XGTIIC-luc promoter regulating firefly luciferase, CMV promoter regulated renilla luciferase along with the indicated cDNAs were incubated with 200 HA/ml SeV for 12 hours followed by a standard reporter dual luciferase assay. Normalized IFN-β activation fold changes

are represented as histograms representing Mean  $\pm$  SD. Significance for the three independent replicates of the comparison cohorts was measured using an unpaired Students t-test. (\*= $p < 0,05$  and \*\*\*= $p < 0.005$ ,  $n=3$ ).

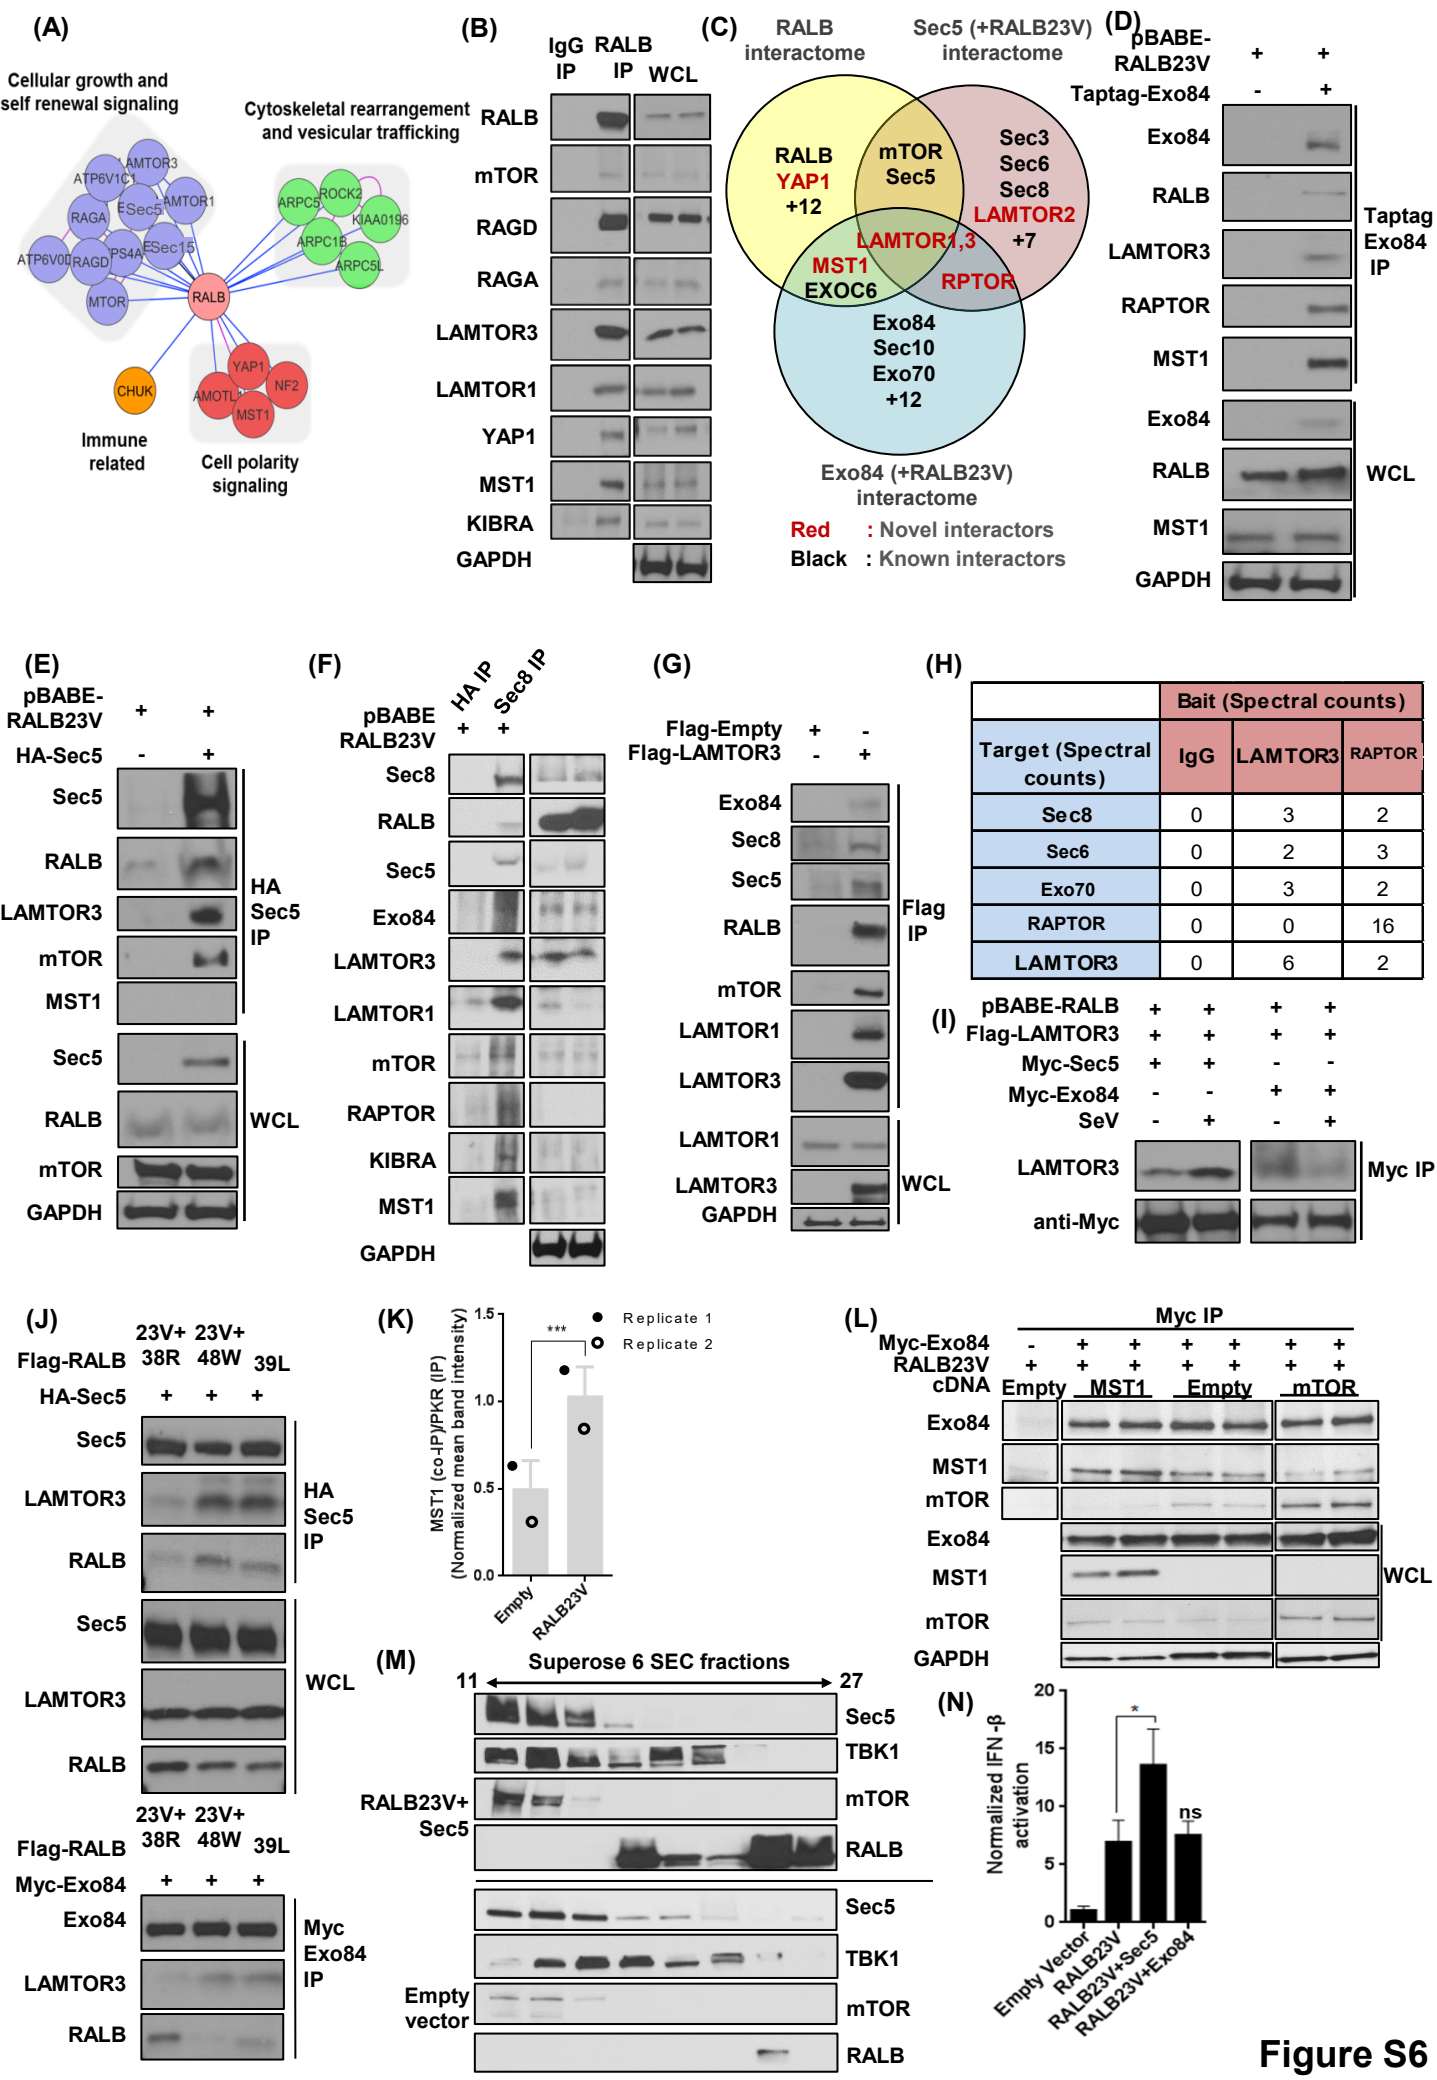

Figure S6

**Figure S6. RALB driven dynamic assembly of Sec5 and Exo84 ternary complexes occur in expense of dissociation of competitive binding effectors, related to Figure 6.**

**(A and B) RALB core complex identifies MST1 and LAMTORs as novel interactors.** **(A)** Using antibodies specific for RALB, a de-novo RALB interactome was generated using the AP-MS pipeline. The blue edges emanating from RAL represent experimental interactions; pink edges between other nodes represent interactions reported in the BIOGRID database. The nodes were manually classified into different functional groups as indicated using the grey box. **(B)** Western blot validation of the hits from **(A)**.

**(C) Active RALB driven exocyst interactome.** **(Left)** Transiently overexpressed Taptag-Exo84 and HA-Sec5 were immunoprecipitated from HEK293T cells stably overexpressing RALB23V. The immunoprecipitates were analyzed for coimmunoprecipitation of proteins using LC-MS. The RALB driven Exo84 and Sec5 interactome was superimposed on the de-novo RAL interactome to generate comparisons represented as an euler plot.

**(D, E and F) Western blot validation of active RALB driven Exo84 and Sec5 interactome.** Endogenous Sec8, Taptag-Exo84, HA-Sec5 was immunoprecipitated from HEK293T cells in the presence of stable expression of **(D)** RALB23V and Exo84 or **(E)** RALB23V and Sec5 or **(F)** RALB23V, respectively. **(D and E)** Exo84 and Sec5 was immunoprecipitated with antibodies directed to the specified tags. **(F)** Endogenous Sec8 was immunoprecipitated using as established anti-Sec8 antibody. Immunoprecipitates were analyzed for coimmunoprecipitation of the indicated proteins. Data are representative of 2 independent replicates.

**(G) LAMTOR3 and mTOR interact with RALB and exocyst holocomplex subunits.** HEK293T transiently overexpressing Flag-LAMTOR3 was used to immunoprecipitate LAMTOR3 and the indicated proteins were analyzed for coimmunoprecipitation. Data are representative of 2 independent replicates.

**(H) LAMTOR complex components are a common interactor for exocyst and RAPTOR.** The table illustrates MS/MS spectral count values of exocyst subunits, LAMTOR3 and RAPTOR identified in LAMTOR3 and RAPTOR interactome. Data are representative of 2 independent replicates.

**(I) LAMTOR3 exocyst interaction is stimulus specific.** HEK293T cells transiently expressing the indicated cDNA were grown to confluence and treated with SeV for the indicated hours. Exo84 or Sec5 was immunoprecipitated using anti-Myc antibody and analyzed for by

coimmunoprecipitation for the indicated proteins by SDS-PAGE. Data are representative of 2 independent replicates.

**(J) RALB drives LAMTOR3 interaction with the exocyst holocomplex and Sec5 subcomplex.** Point mutations in RALB23V that have differential association of RALB with either Exo84 or Sec5 were overexpressed stably in fusion tagged Sec5 expressing HEK293T cells. Sec5 was immunoprecipitated and the indicated proteins were analyzed using SDS-PAGE. Data are representative of 2 independent replicates.

**(K) RALB is sufficient to increase the PKR/MST1 interaction.** Quantification of two replicates of representative data demonstrated in **Figure 6G**. Normalized mean band intensity for MST1 co-immunoprecipitation with PKR immunoprecipitation was represented as a bar graph. Error bar indicates SD. Statistical significance was measured using a Mann Whitney U test ( $p < 0.01$ ).

**(L) MST1 and mTOR can competitively dissociate each other from Exo84.** Myc-Exo84 and RALB23V expressing HEK293T cells were transfected with either MST1 or empty vector or mTOR overexpression cDNA constructs and grown to confluence and Exo84 was immunoprecipitated using an anti-Myc antibody and analyzed for coimmunoprecipitation of the indicated proteins using SDS-PAGE.

**(M) Active RALB and Sec5 co-expression results in distinct high molecular weight complex partition profile for TBK1 and mTOR.** HEK293T cells transiently expressing the indicated cDNAs were grown to confluence and cells were collected in gel filtration buffer. Filtered lysates were injected onto a supersoe6 column at 0.2ml/min rate and forty 0.5ml fractions were collected and fractions 13<sup>th</sup> to 29<sup>th</sup> were analyzed by SDS-PAGE for the indicated proteins. Data are representative of 2 replicates.

**(N) RALB23V and Sec5 co-expression activates IFN- $\beta$  activity.** HEK293T cells ectopically expressing 8XGTIIC-luc luciferase reporter expressing firefly luciferase with a renilla luciferase control and plasmids expressing the indicated cDNA or empty vector were grown for 24 hours and normalized Hippo induction was measured using a standard dual luciferase assay. Data are shown as a histogram representing Mean  $\pm$  SD. Statistical comparison between the cohorts using three independent replicates was measured using a Student's unpaired t-test where  $p$  value  $< 0.05$ .

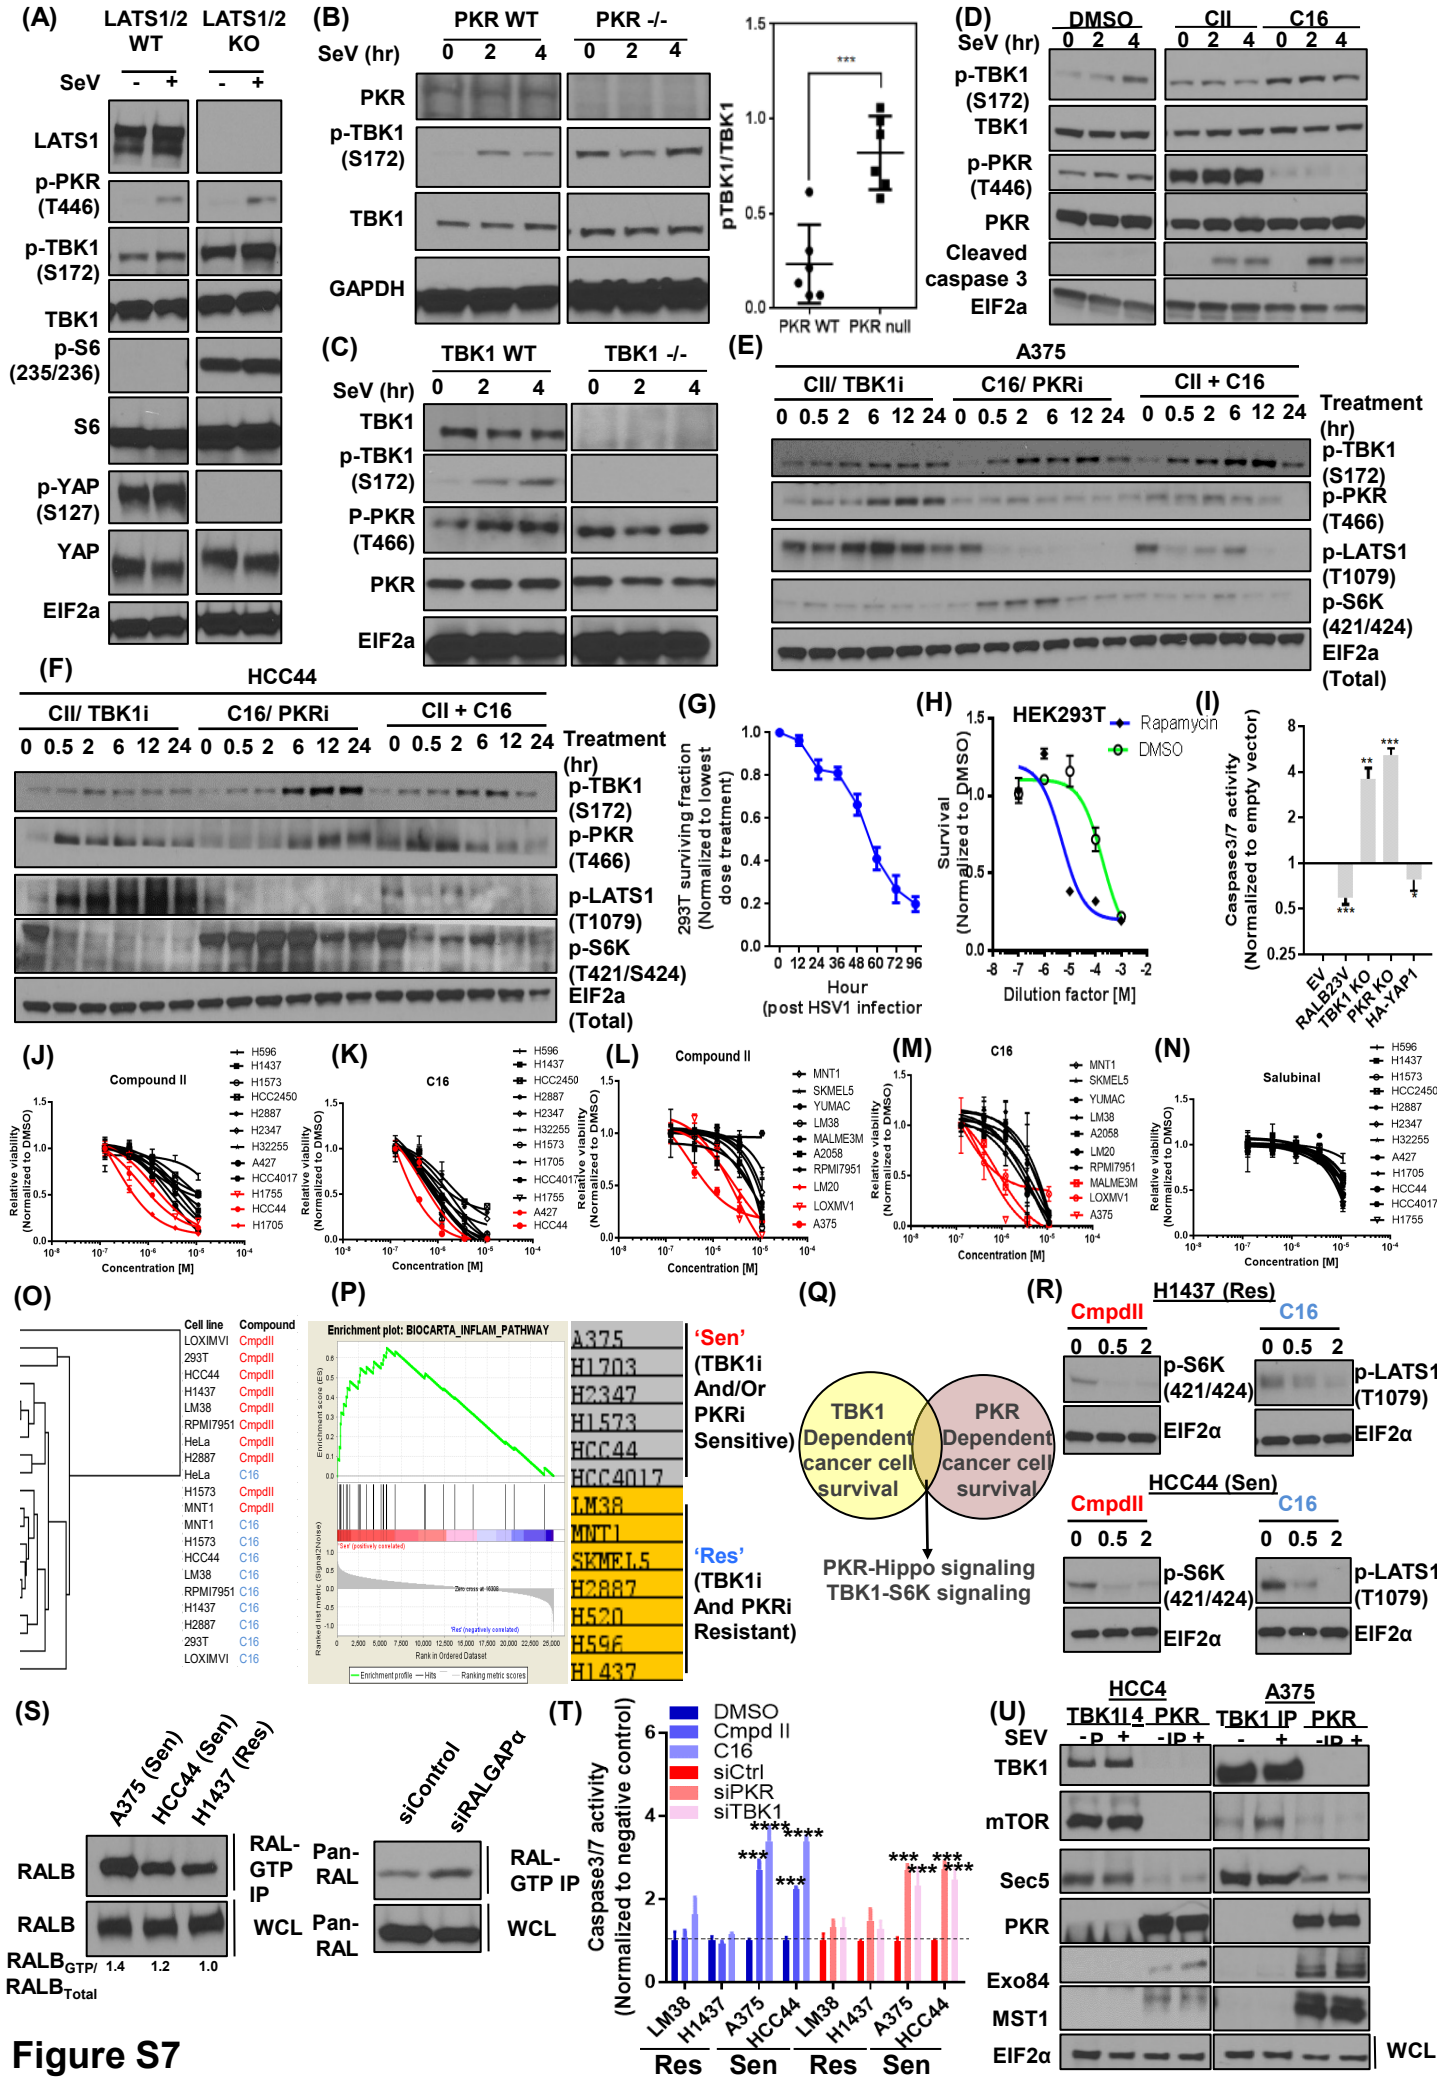

Figure S7



**Figure S7. A subset of cancer cells coopts exocyst dependent concomitant activation of hippo and mTOR signaling for cellular survival, related to Figure 7.**

**(A) High baseline TBK1 and mTOR activity in LATS1/2 knockout cells.** LATS1/2 wildtype and knockout 293A cells were grown to confluence and treated as indicated. After treatment, cells were harvested, and lysates were analyzed for the indicated proteins using SDS-PAGE. Western blot images run on the same membrane were used for comparison. Data is representative of 2 replicates

**(B and C) High baseline TBK1 activity in PKR null MEFs and vice versa.** TBK1 and PKR wildtype and null MEFs were grown to confluence and treated as indicated. After treatment, cells were harvested, and lysates were analyzed for indicated proteins using SDS-PAGE. Significance for comparison between the cohorts was measured using an unpaired Student's t-test (\*\*= p<0.001). Western blot images run on the same membrane were used for comparison of p-TBK1/TBK1 ratio between WT and null cohorts. Data is representative of 2 replicates

**(D, E and F) TBK1 and PKR inactivation causes upregulation of the other.** **(D)** HeLa and **(E)** A375 (melanoma cell line) and **(F)** HCC44 (lung cancer cell line) cells grown to confluence, pre-treated with vehicle (DMSO), Compound II and C16 for indicated hours, were exposed to Sev for the indicated hours. Lysates were collected from the harvested cells and the protein levels indicated were measured by SDS-PAGE. Western blot images run on the same membrane were used for comparison. Data is representative of 2 replicates

**(G) HSV1 toxicity kinetics.** HEK293T cells were incubated with 10<sup>6</sup> PFU HSV1 virus stock for indicated hours and their post infection normalized viability was measured where error bars indicate SD and n=3.

**(H) mTOR signaling is immune protective.** HEK293T cells were pretreated with 0.2μM Rapamycin for 6 hours followed by indicated dilutions of 10<sup>6</sup> PFU HSV1 virus stock. 48 hours post infection relative cell viability was measured using Cell Titer Glo. Dose response curves are plotted from 3 independent replicates and error bars indicate SD.

**(I) Role of RALB, YAP, PKR and TBK1 during HSV1 cytotoxicity in isogenic cells.** HEK293T cells stably over-expressing RALB23V or HA-YAP and deficient in TBK1 and PKR (through CRISPR mediated knock out) were incubated with HSV1 (MOI 2.5) for 24 hours and analyzed by cellular Caspase 3/7 level using the Caspase Glo reagent. Data are represented as a bar diagram with Mean ± SD where \*\* indicates p<0.01 and \*\*\* indicates p<0.005.

**(J, K, L, M and N) Dose response curves of lung cancer cells and melanoma cells treated with TBK1 inhibitor, Compound II, PKR inhibitor, C16 and EIF2a inhibitor salubrinal.** 24-hours post seeding, lung (J, K and N) and melanoma (L and M) cell lines grown on 96 well plates, were treated for the indicated compounds for an additional 72 hours. Cells were lysed cell viability assessed using the Cell Titer Glo assay and viability was plotted as dose response using 4-parameter non linear curve fitting. Red lines indicate classification of the cell line as sensitive to each of the compounds whereas black indicates resistant cell lines. Each dots in dose response curves represents mean viability where n=3 and error bars represent standard deviation (SD).

**(O) Mode of action of PKR inhibitor and TBK1 inhibitor is divergent.** 10 different cell lines from lung cancer and melanoma origin were grown to confluence and were treated with vehicle (DMSO), Compound II and C16 for 2 hours. Collected lysates from the cells were subjected to dot blot protein array that catalogued levels of 35 protein alterations relevant to pathways of cellular growth and immunity (see methods for detail). Intensity of the dot blots was measured. For each protein alteration, the levels in Compound II and C16 exposed cells were normalized to DMSO. Normalized values were used to generate 2-way unsupervised hierarchical clustering. A dendrogram for the clustering of the samples is represented where red indicates Compound II and blue indicates C16 treated cells.

**(P) A subset of 'inflammation/immune pathway' dependent cancer cells uses PKR and TBK1 for survival.** 17 lung cancer and 10 melanoma cell lines were treated with PKR inhibitor (C16) or TBK1 inhibitor (CmpdII) for 72 hours and cell viability was measured using Cell Titer Glo. The ED50 values for each lineage were separately rank ordered and cell lines with values in the first and third quartile for TBK1 or PKR inhibitor treatments were individually selected. Gene set enrichment analysis (GSEA) was performed comparing cell lines that were TBK1 inhibitor and/or PKR inhibitor sensitive versus resistant. GSEA analysis identified gene set 'BIOCARTA-INFLAM-PATHWAY' as the most enriched gene sets (NES=0.65)

**(Q) Representation of a strategy for identifying TBK1 and PKR mediated promotion of tumor cell viability.** Schematic Venn diagram outlining hypothesized overlap between the PKR and TBK1 mediated cell viability. TBK1 inhibitor (CmpdII) and PKR inhibitor (C16) IC50 values obtained from 17 lung cancer and 10 melanoma cell lines were measured and used for defining this cohort.

**(R) PKR ablation causes LATS1 downregulation whereas TBK1 ablation causes S6K downregulation in cancer cells.** The indicated cell lines were treated with indicated compounds

for the hours indicated. Lysates were collected and were analyzed by Western blot for indicated proteins.

**(S) 'Immune pathway dependent' cancer cell lines with high PKR and TBK1 activity show high RALB activity.** Active RALB present in the indicated cell lines was immunoprecipitated using GST-RBD and analyzed for the indicated proteins in immunoprecipitates and whole cell lysates. As an assay control, active RALB from HEK293T cells reverse transfected with indicated siRNAs were immunoprecipitated using GST-Sec5-RBD and analyzed for indicated proteins in immunoprecipitates and whole cell lysates. Band intensities were measured for quantification of relative RALB-GTP level.

**(T) Genetic and pharmacological TBK1 and PKR perturbation causes apoptosis in 'immune pathway dependent' lines.** Indicated cells were incubated with the compounds for 36 hours and cleaved caspase 3 level- a marker for apoptosis- was measured by Caspase Glo fluorescent read out. Normalized caspase 3/7 level is illustrated as a bar graph representing Mean  $\pm$  SD. Statistical significance is measured by Student's t test where \*\*\*\*  $p < 0.001$ , and \*\*\*  $p < 0.005$  for  $n=3$ .

**(U) TBK1/Sec5/mTOR and PKR/Exo84/MST1 form protein complexes in sensitive cells.** PKR and TBK1 was immunoprecipitated in the presence or absence of SeV from HCC44 (lung) and A375 (melanoma) cells and probed for coimmunoprecipitation for the indicated proteins.

**Table S2, related to STAR methods and Figure 1: Exo84 interactome in the presence or absence of pl:C**

| <b>Proteins</b> | <b>Average SC (-pl:C)</b> | <b>Average SC (+pl:C)</b> |
|-----------------|---------------------------|---------------------------|
| <b>Exo84</b>    | 21.5                      | 23                        |
| <b>EXOC7</b>    | 4.5                       | 4.5                       |
| <b>EXOC6</b>    | 3                         | 3.5                       |
| <b>EXOC5</b>    | 3                         | 3                         |
| <b>Sec8</b>     | 14                        | 3                         |
| <b>EIF2AK2</b>  | 0.5                       | 7.5                       |
| <b>NKRF</b>     | 2.5                       | 5.5                       |
| <b>EIF23E</b>   | 6                         | 0.5                       |

\*SC= Spectral count

**Table S3, related to STAR methods and Figure 1: Sec5 interactome in the presence or absence of pl:C**

| <b>Proteins</b> | <b>Average SC (-pl:C)</b> | <b>Average SC (+pl:C)</b> |
|-----------------|---------------------------|---------------------------|
| <b>Sec5</b>     | 28                        | 26                        |
| <b>EXOC1</b>    | 3.5                       | 4.5                       |
| <b>EXOC3</b>    | 2.5                       | 3.5                       |
| <b>Sec8</b>     | 4.5                       | 6                         |

\*SC= Spectral count

**Table S4, related to STAR methods and Figure 2: de-novo TBK1 interactome**

| <b>Protein</b>  | <b>Average SC<br/>(Flag-Empty)</b> | <b>Average SC<br/>(Flag-TBK1)</b> | <b>Average SC<br/>(Flag-TBK1-KD)</b> | <b>Log2 TBK1-<br/>endogenous<br/>(+pl:C/-pl:C)</b> |
|-----------------|------------------------------------|-----------------------------------|--------------------------------------|----------------------------------------------------|
| <b>CEP128</b>   | 0                                  | 9.5                               |                                      |                                                    |
| <b>IFIT1</b>    | 0                                  | 10.0                              |                                      |                                                    |
| <b>IFITM2</b>   | 0                                  | 4.5                               |                                      |                                                    |
| <b>ISG15</b>    | 0                                  | 3.0                               |                                      |                                                    |
| <b>RPS6KB1</b>  | 0                                  | 3.0                               |                                      |                                                    |
| <b>RPTOR</b>    | 0                                  | 4.5                               |                                      |                                                    |
| <b>TBK1</b>     | 0                                  | 26.0                              | 16.5                                 | 0                                                  |
| <b>ATR</b>      | 0                                  | 4.0                               | 2.5                                  | 0                                                  |
| <b>DDRKG1</b>   |                                    |                                   |                                      | 0                                                  |
| <b>HERC2</b>    |                                    |                                   |                                      | -2.5                                               |
| <b>NUBP2</b>    |                                    |                                   |                                      | 0                                                  |
| <b>Sec5</b>     | 0                                  | 2.0                               |                                      | 2                                                  |
| <b>Sec8</b>     | 0                                  | 2.5                               |                                      | 2.5                                                |
| <b>TOR1AIP1</b> |                                    |                                   |                                      | -1                                                 |
| <b>WASH6P</b>   |                                    |                                   |                                      | -0.5                                               |
| <b>BRE</b>      |                                    |                                   |                                      | -1                                                 |
| <b>YAP1</b>     | 0                                  | 2.0                               | 2.5                                  |                                                    |
| <b>TGFBI</b>    | 0                                  | 1.0                               | 4.5                                  |                                                    |
| <b>YWHAE</b>    | 0                                  | 0.0                               | 2.5                                  |                                                    |

\***SC**= Spectral count

**Table S5, related to STAR methods and Figure 2: Endogenous PKR partners and their enrichment or depletion upon presence or absence of pl:C stimuli**

| Protein | Log2 $\left[\frac{\text{Average SC (+pl:C)}}{\text{Average SC (-pl:C)}}\right]$ |
|---------|---------------------------------------------------------------------------------|
| Exo84   | 6                                                                               |
| WDR82   | 0.5                                                                             |
| PTPN1   | 0                                                                               |
| Sec5    | 0                                                                               |
| EIF2A   | 0                                                                               |
| KIBRA   | 0                                                                               |
| MST1    | 0                                                                               |
| CSNK2A2 | 0                                                                               |
| PRKRA   | 0                                                                               |
| NF2     | 0                                                                               |
| PVR     | 0                                                                               |
| NT5DC1  | 0                                                                               |
| TBCD    | 0                                                                               |
| ACOT9   | 0                                                                               |
| PKR     | -0.5                                                                            |
| DDRGK1  | -1                                                                              |

\*SC= Spectral count

**Table S6, related to STAR methods, Figure 6 and Figure S 6: RALB interactome**

| <b>Proteins</b> | <b>SC<br/>(Replicate1)</b> | <b>SC<br/>(Replicate2)</b> | <b>SC<br/>(Replicate3)</b> | <b>SC<br/>(Replicate4)</b> | <b>SC<br/>(IgG<br/>control)</b> |
|-----------------|----------------------------|----------------------------|----------------------------|----------------------------|---------------------------------|
| <b>AMOTL1</b>   | 2.0                        | 2.0                        | 5.0                        | 1.0                        | 0.00                            |
| <b>ARPC1B</b>   | 18.0                       | 13.0                       | 13.0                       | 14.0                       | 0.00                            |
| <b>ARPC5</b>    | 7.0                        | 4.0                        | 7.0                        | 6.0                        | 0.00                            |
| <b>ARPC5L</b>   | 4.0                        | 3.0                        | 4.0                        | 4.0                        | 0.00                            |
| <b>ATP6V0D1</b> | 5.0                        | 7.0                        | 9.0                        | 8.0                        | 0.00                            |
| <b>ATP6V1C1</b> | 3.0                        | 2.0                        | 3.0                        | 2.0                        | 0.00                            |
| <b>CHUK</b>     | 2.0                        | 2.0                        | 2.0                        | 2.0                        | 0.00                            |
| <b>EXOC2</b>    | 3.0                        | 3.0                        | 3.0                        | 3.0                        | 0.00                            |
| <b>EXOC6</b>    | 2.0                        | 2.0                        | 2.0                        | 2.0                        | 0.00                            |
| <b>KIAA0196</b> | 2.0                        | 3.0                        | 4.0                        | 3.0                        | 0.00                            |
| <b>LAMTOR1</b>  | 6.0                        | 5.0                        | 6.0                        | 7.0                        | 0.00                            |
| <b>LAMTOR3</b>  | 2.0                        | 2.0                        | 3.0                        | 1.0                        | 0.00                            |
| <b>MTOR</b>     | 4.0                        | 6.0                        | 3.0                        | 4.0                        | 0.00                            |
| <b>NF2</b>      | 2.0                        | 2.0                        | 8.9                        | 2.0                        | 0.00                            |
| <b>RAGA</b>     | 2.0                        | 2.0                        | 2.0                        | 2.0                        | 0.00                            |
| <b>RAGD</b>     | 2.0                        | 2.0                        | 2.0                        | 2.0                        | 0.00                            |
| <b>RALB</b>     | 15.0                       | 13.0                       | 11.0                       | 18.0                       | 0.00                            |
| <b>ROCK2</b>    | 2.0                        | 4.0                        | 3.0                        | 1.0                        | 0.00                            |
| <b>STK4</b>     | 2.0                        | 2.0                        | 2.0                        | 2.0                        | 0.00                            |
| <b>VPS4A</b>    | 2.5                        | 2.0                        | 3.5                        | 2.5                        | 0.00                            |
| <b>YAP1</b>     | 2.0                        | 2.0                        | 9.0                        | 2.0                        | 0.00                            |

\*SC= Spectral count



**Table S7, related to STAR methods, Figure 6 and Figure S 6: RALB dependent Exo84 and Sec5 interactome (visual network representation of the table is below)**

| <b>Protein name</b> | <b>Average SC (RALB+Exo84)</b> | <b>Average SC (RALB+Sec5)</b> | <b>{Average SC (RALB+Exo84)} / {Average SC (RALB+Sec5)}</b> | <b>Log<sub>2</sub> [{Average SC (RALB+Exo84)} / {Average SC (RALB+Sec5)}]</b> |
|---------------------|--------------------------------|-------------------------------|-------------------------------------------------------------|-------------------------------------------------------------------------------|
| <b>Exo84</b>        | 44                             | 1                             | 44                                                          | 5.46                                                                          |
| <b>RIOK1</b>        | 6                              | 0.5                           | 12                                                          | 3.58                                                                          |
| <b>PRPSAP1</b>      | 9                              | 1                             | 9                                                           | 3.17                                                                          |
| <b>MST1</b>         | 8                              | 1                             | 8                                                           | 3.00                                                                          |
| <b>EIF3X</b>        | 3.5                            | 0.5                           | 7                                                           | 2.81                                                                          |
| <b>EIF2AK2</b>      | 6                              | 1                             | 6                                                           | 2.58                                                                          |
| <b>DENR</b>         | 3                              | 0.5                           | 6                                                           | 2.58                                                                          |
| <b>AP3S1</b>        | 3                              | 0.5                           | 6                                                           | 2.58                                                                          |
| <b>VPS4B</b>        | 3                              | 0.5                           | 6                                                           | 2.58                                                                          |
| <b>ULK1</b>         | 5                              | 1                             | 5                                                           | 2.32                                                                          |
| <b>RPTOR</b>        | 5                              | 1                             | 5                                                           | 2.32                                                                          |
| <b>EXOC7</b>        | 2.5                            | 0.5                           | 5                                                           | 2.32                                                                          |
| <b>LAMTOR2</b>      | 4                              | 1                             | 4                                                           | 2.00                                                                          |
| <b>LAMTOR3</b>      | 2                              | 0.5                           | 4                                                           | 2.00                                                                          |
| <b>LAMTOR1</b>      | 5                              | 2                             | 2.5                                                         | 1.32                                                                          |
| <b>EXOC6</b>        | 2.5                            | 1                             | 2.5                                                         | 1.32                                                                          |
| <b>EXOC5</b>        | 1.5                            | 3                             | 0.5                                                         | -1.00                                                                         |
| <b>EXOC1</b>        | 1.5                            | 3.5                           | 0.429                                                       | -1.22                                                                         |
| <b>VAPA</b>         | 5                              | 15                            | 0.333                                                       | -1.58                                                                         |
| <b>mTOR</b>         | 0.5                            | 2                             | 0.25                                                        | -2.00                                                                         |
| <b>METAP2</b>       | 1                              | 4.93                          | 0.203                                                       | -2.30                                                                         |
| <b>Sec5</b>         | 1                              | 5.99                          | 0.167                                                       | -2.58                                                                         |
| <b>METAP1</b>       | 0.5                            | 3                             | 0.167                                                       | -2.58                                                                         |
| <b>MAP2K1</b>       | 1                              | 8                             | 0.125                                                       | -3.00                                                                         |
| <b>COPS2</b>        | 0.5                            | 4.5                           | 0.111                                                       | -3.17                                                                         |

|                |     |      |       |       |
|----------------|-----|------|-------|-------|
| <b>Sec8</b>    | 1   | 9.97 | 0.1   | -3.32 |
| <b>MRT04</b>   | 1.5 | 16   | 0.094 | -3.42 |
| <b>GTF2EF2</b> | 1   | 12   | 0.083 | -3.58 |
| <b>EXOC3</b>   | 1   | 18   | 0.056 | -4.17 |

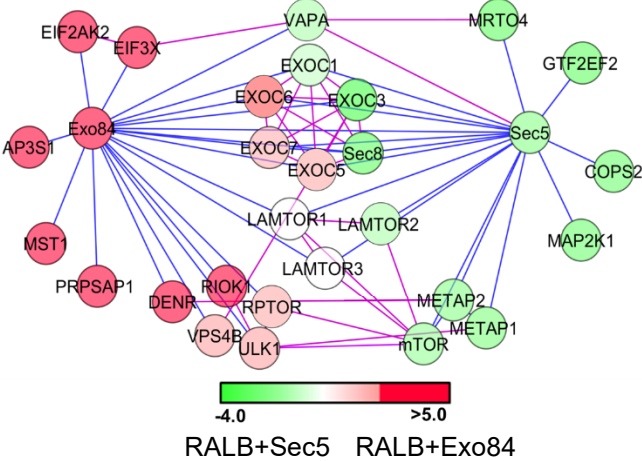

\*Legends for the node and edges as described in Figure legends 1D.
